# Supplementary material for: Chemically differentiating ascorbate-mediated dissolution of quantum dots in cell culture media
Source: Royal Society of Chemistry journal article supplement (doi:10.1039/c2nr33365a), 2013-01-01
Supplement: c2nr33365a.pdf [file c2nr33365a.pdf]

## **Supplementary Material**

### **Chemically Differentiating Ascorbate-Mediated Dissolution of Quantum Dots in Cell Culture Media**

Cheng-Kuan Su and Yuh-Chang Sun\*

Department of Biomedical Engineering and Environmental Sciences, National Tsing-Hua University, Hsinchu, 30013, Taiwan.

\*Corresponding Author: E-mail: ycsun@mx.nthu.edu.tw

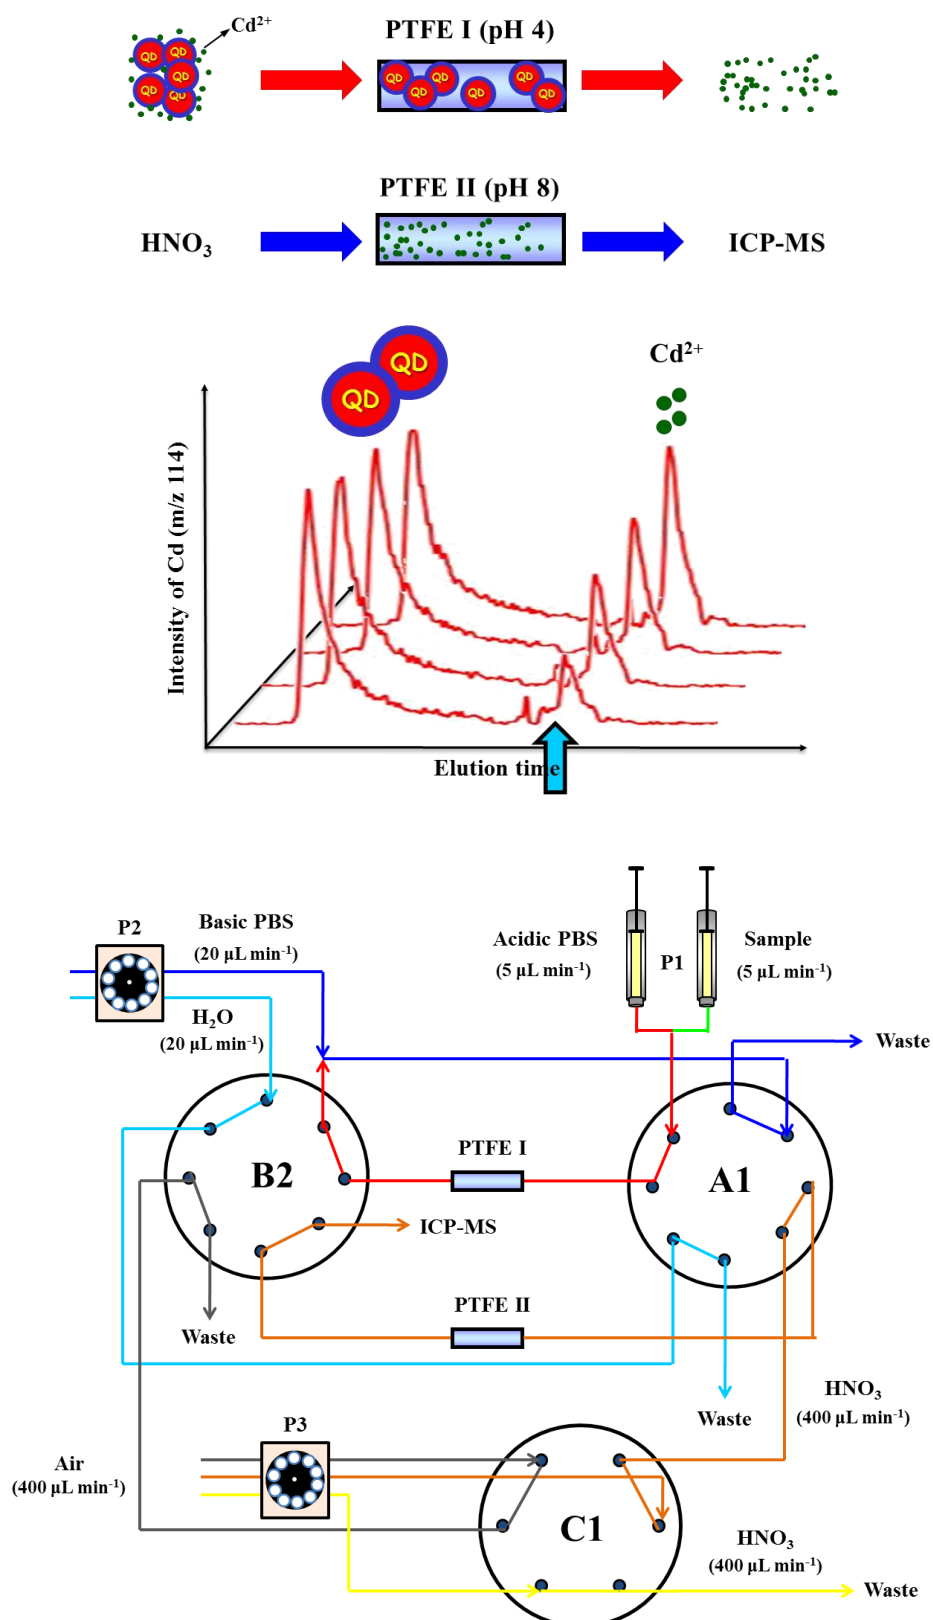

**Figure S1.** Step 1 (A1:B2:C1): fill acidified sample into PTFE I (red line); detach Cd<sup>2+</sup> ions from PTFE II and deliver to ICP mass spectrometer (orange line).

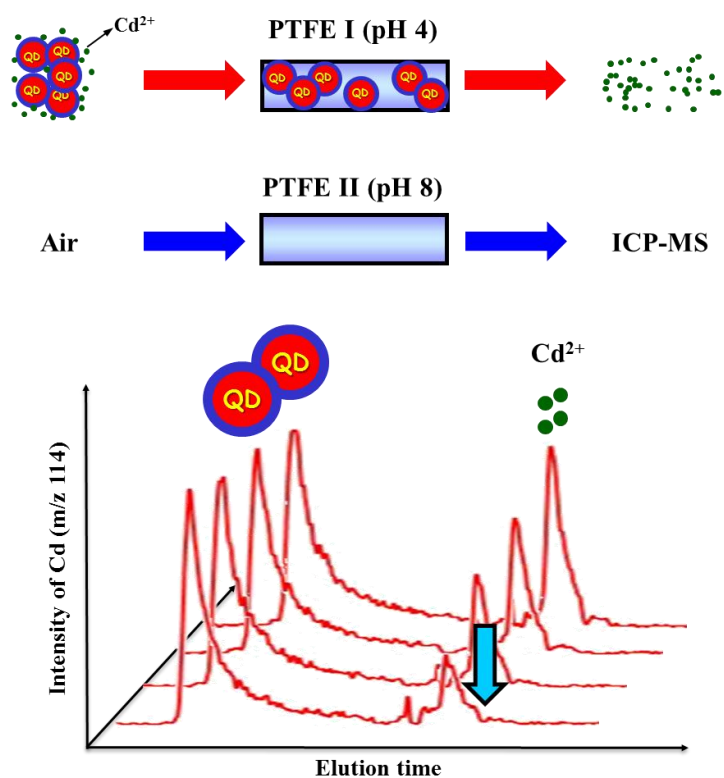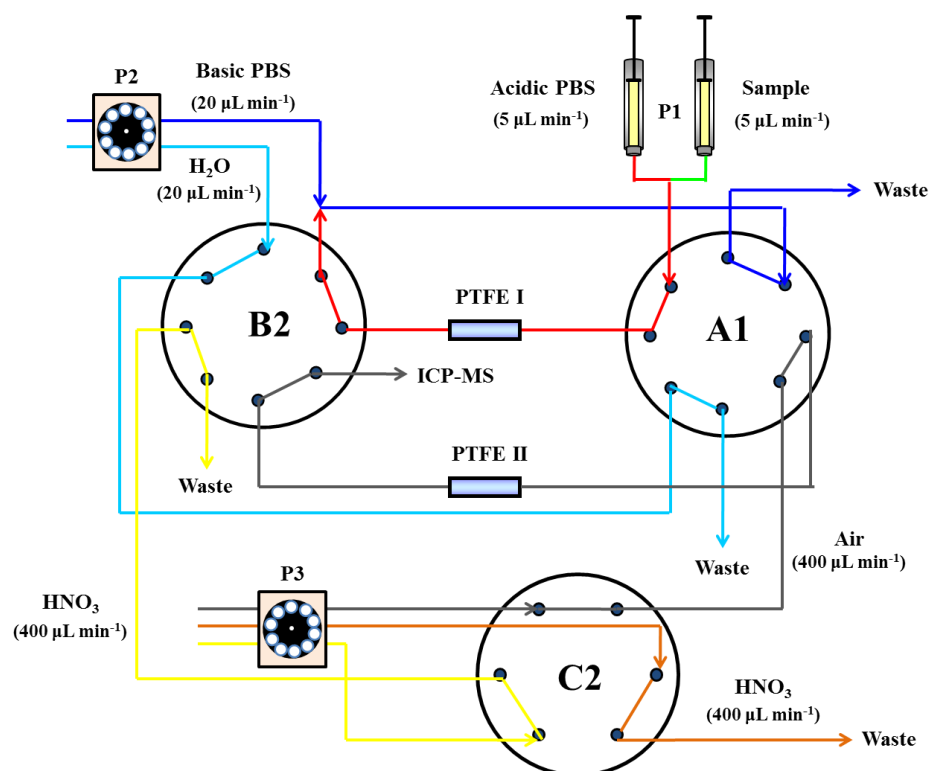

**Figure S2.** Step 2 (A1:B2:A2): fill acidified sample into PTFE I (red line); replace HNO<sub>3</sub> in PTFE II with air carrier stream (gray line).

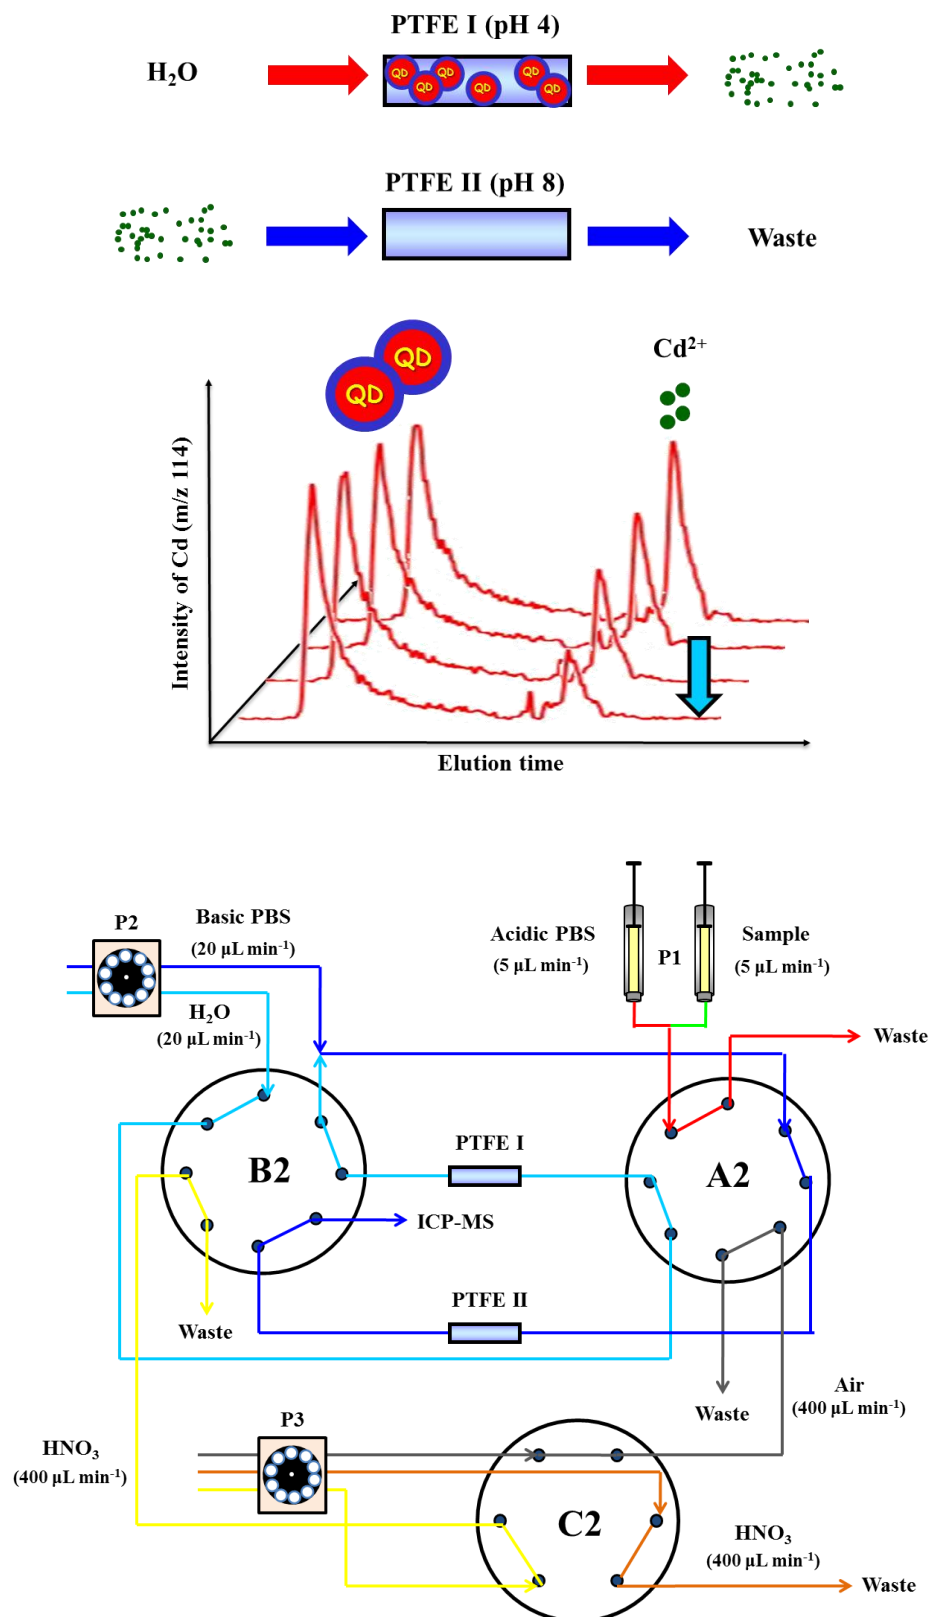

**Figure S3.** Step 3 (A2:B2:A2): remove sample from PTFE I (aqua blue line); deliver the sample buffered with basic PBS into PTFE II (blue line).

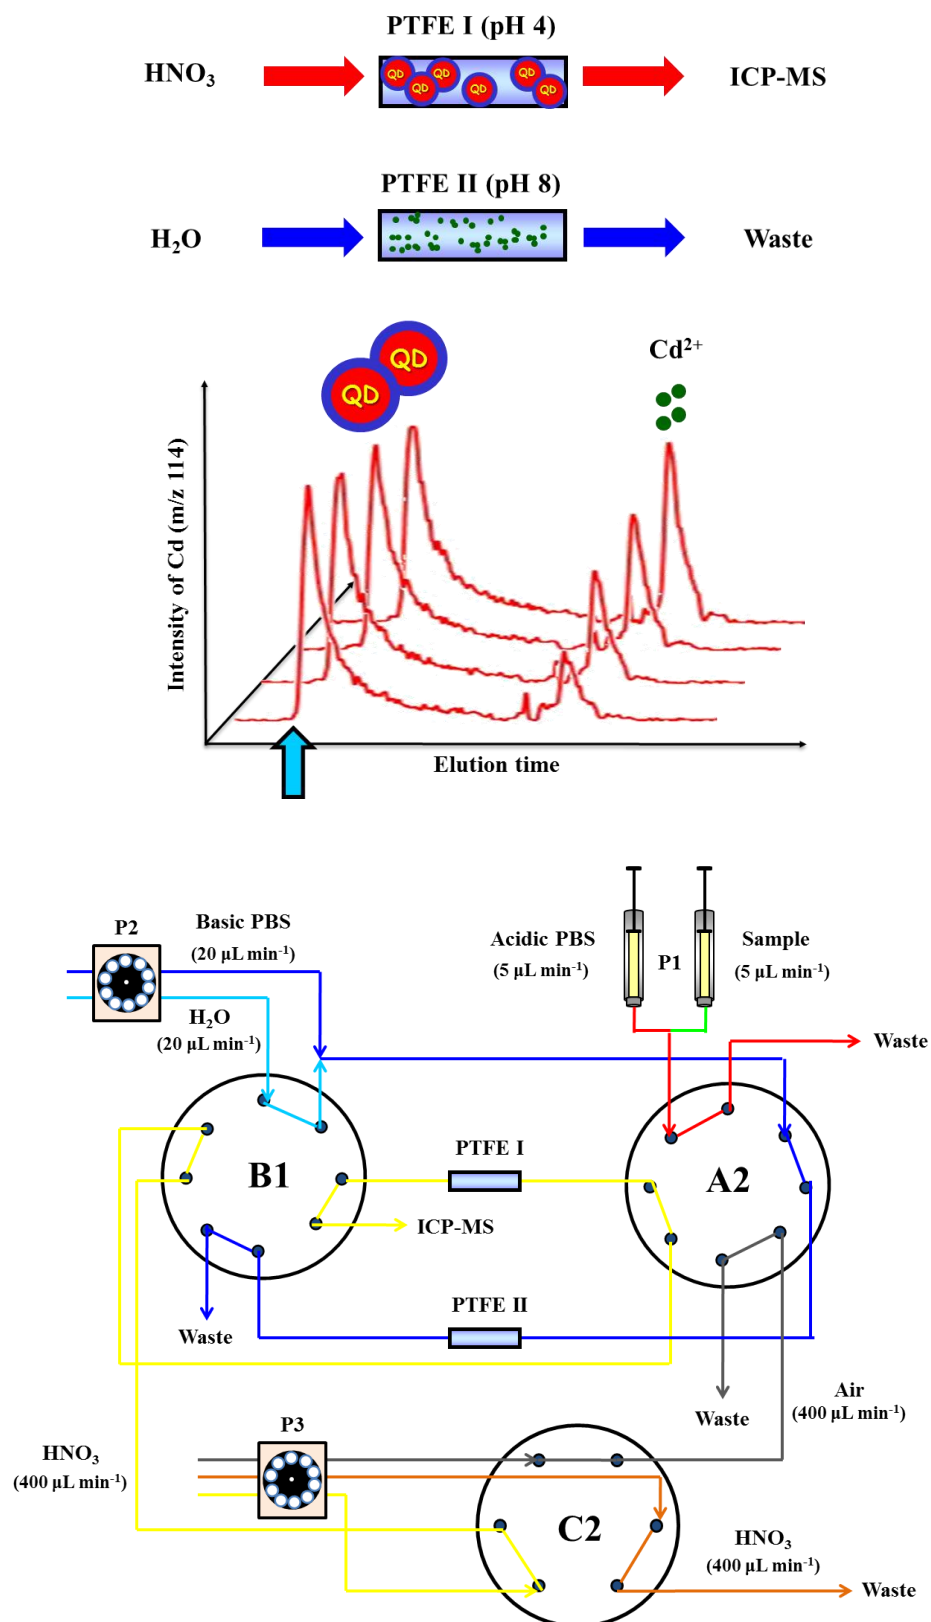

**Figure S4.** Step 4 (A2:B1:A2): detach QD705 from PTFE I and deliver to ICP mass spectrometer (yellow line); deliver the sample buffered with basic PBS into PTFE II (blue line).

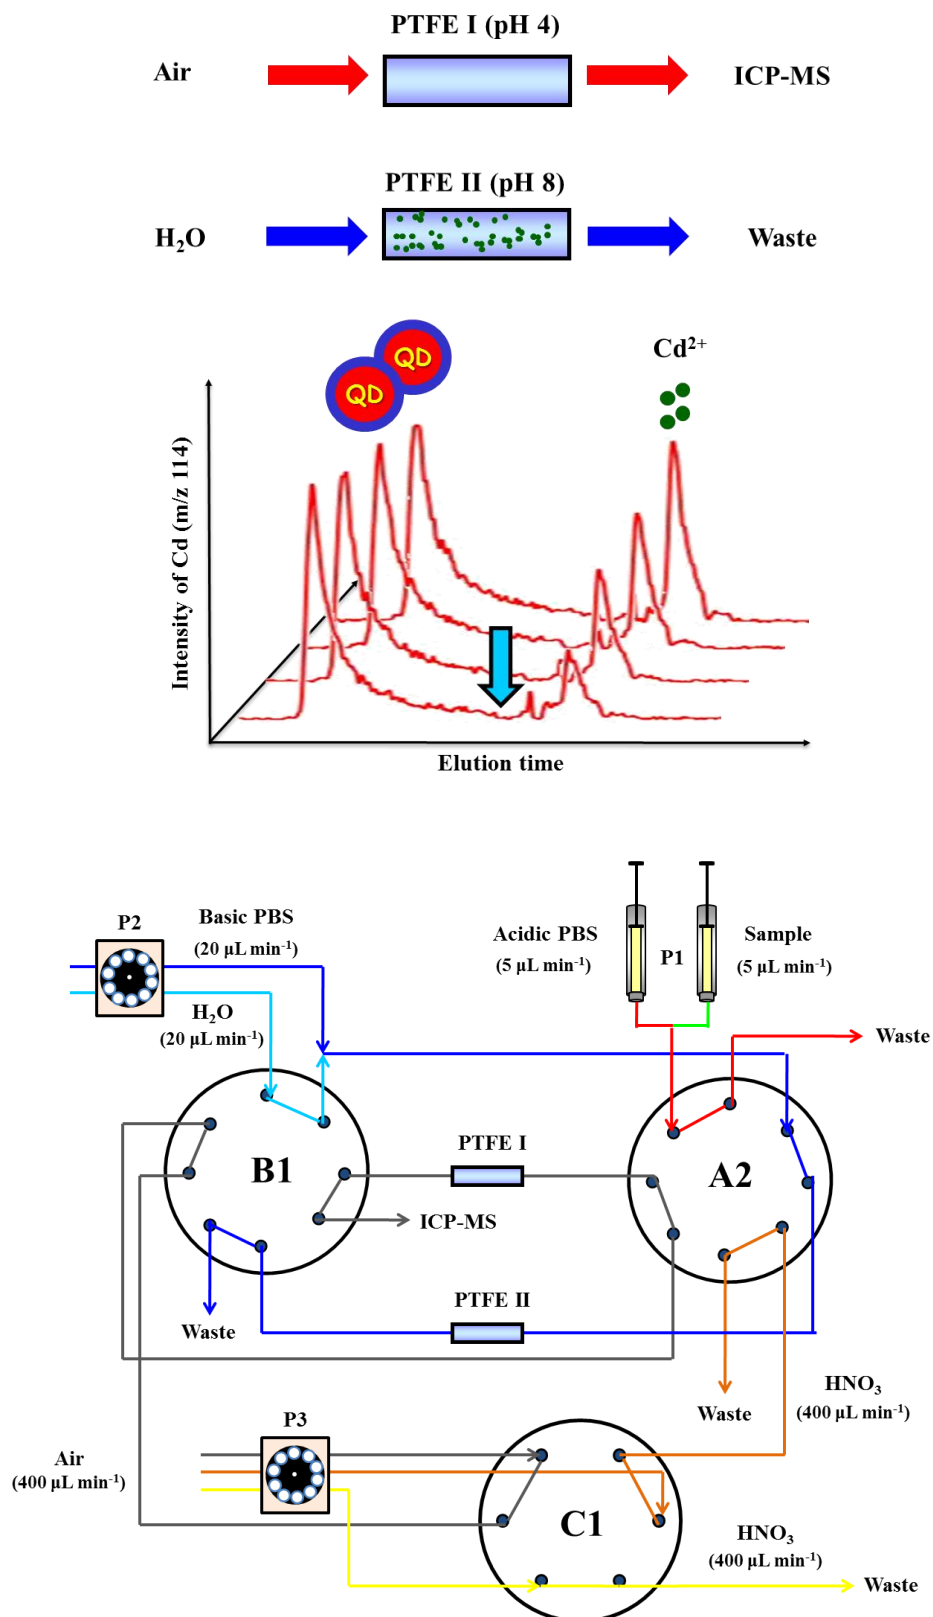

**Figure S5.** Step 5 (A2:B1:A1): replace HNO<sub>3</sub> in PTFE I with air carrier stream (gray line); then return to step 1.

**Table S1.** Operation sequence of the sequential in-tube PTFE SPE-ICP-MS hyphenated system

| Step | Function                                                                                                          | Valve position   | Time, s | Medium delivered     | Flow rate, $\mu\text{L min}^{-1}$ |
|------|-------------------------------------------------------------------------------------------------------------------|------------------|---------|----------------------|-----------------------------------|
| 1    | Fill acidified sample into PTFE I; detach $\text{Cd}^{2+}$ ions from PTFE II and deliver to ICP mass spectrometer | A: 1 (load)      | 90      | Sample               | 5                                 |
|      |                                                                                                                   | B: 2 (injection) |         | Acidic PBS           | 5                                 |
|      |                                                                                                                   | C: 1 (load)      |         | $\text{HNO}_3$ , air | 400                               |
| 2    | Fill acidified sample into PTFE I; replace $\text{HNO}_3$ in PTFE II with air carrier stream                      | A: 1 (load)      | 30      | Sample               | 5                                 |
|      |                                                                                                                   | B: 2 (injection) |         | Acidic PBS           | 5                                 |
|      |                                                                                                                   | C: 2 (injection) |         | $\text{HNO}_3$ , air | 400                               |
| 3    | Remove sample from PTFE I; deliver the sample buffered with basic PBS into PTFE II                                | A: 2 (injection) | 180     | Sample               | 20                                |
|      |                                                                                                                   | B: 2 (injection) |         | Basic sample         | 40                                |
|      |                                                                                                                   | C: 2 (injection) |         |                      |                                   |
| 4    | Detach QD705 from PTFE I and deliver to ICP mass spectrometer                                                     | A: 2 (injection) | 150     | $\text{HNO}_3$ , air | 400                               |
|      |                                                                                                                   | B: 1 (load)      |         | Basic sample         | 40                                |
|      |                                                                                                                   | C: 2 (injection) |         |                      |                                   |
| 5    | Replace $\text{HNO}_3$ in PTFE I with air carrier stream                                                          | A: 2 (injection) | 30      | $\text{HNO}_3$ , air | 400                               |
|      |                                                                                                                   | B: 1 (load)      |         | Basic sample         | 40                                |
|      |                                                                                                                   | C: 1 (load)      |         |                      |                                   |

**Table S2.** Optimized parameters for sequential in-tube PTFE SPE-ICP-MS hyphenated system

| <b>Sequential in-tube SPE device</b> |                                                                             |
|--------------------------------------|-----------------------------------------------------------------------------|
| PTFE tubing I                        | 200 cm, 0.007 inch                                                          |
| PTFE tubing II                       | 200 cm, 0.02 inch                                                           |
| Acidic buffer for mixing             | 10 mM PBS, pH 3.7 for saline sample<br>10 mM PBS, pH 1.5 for DMEM + 10% FBS |
| Basic buffer for mixing              | 5 mM PBS, pH 9.2 for saline sample<br>5 mM PBS, pH 11.1 for DMEM + 10% FBS  |
| Sample loading                       | 5 $\mu\text{L min}^{-1}$                                                    |
| Acidic buffer flow rate              | 5 $\mu\text{L min}^{-1}$                                                    |
| Basic buffer flow rate               | 20 $\mu\text{L min}^{-1}$                                                   |
| Eluent                               | 2% $\text{HNO}_3$                                                           |
| Elution flow rate                    | 400 $\mu\text{L min}^{-1}$                                                  |
| Sampling frequency                   | 7.5 $\text{h}^{-1}$                                                         |
| <b>ICP-MS</b>                        |                                                                             |
| ICP mass spectrometer                | Agilent 7500a                                                               |
| Ar gas flow rates                    |                                                                             |
| Plasma                               | 15 $\text{L min}^{-1}$                                                      |
| Auxiliary                            | 0.9 $\text{L min}^{-1}$                                                     |
| Nebulizer                            | 1.03 $\text{L min}^{-1}$                                                    |
| Make-up                              | 0.12 $\text{L min}^{-1}$                                                    |
| Plasma forward power                 | 1500 W                                                                      |
| Sampling cone                        | Ni, 1-mm orifice                                                            |
| Skimmer cone                         | Ni, 0.4-mm orifice                                                          |
